# Supplementary material for: Melanin-like nanoparticles loaded with an angiotensin antagonist for an improved photothermal cancer therapy
Source: Royal Society of Chemistry journal article supplement (doi:10.1039/c9bm01843c), 2020-01-01
Supplement: c9bm01843c1.pdf [file c9bm01843c1.pdf]

# Melanin-like Nanoparticles Loaded with Angiotensin Antagonist for Improved Photothermal Cancer Therapy

Zhengjie Zhou<sup>1,2</sup>, Yang Yan<sup>1</sup>, Qiang Zhang<sup>1,\*</sup> and Yiyun Cheng<sup>1,3,\*</sup>

<sup>1</sup>Shanghai Key Laboratory of Regulatory Biology, School of Life Sciences, East China Normal University, Shanghai, 200241, P.R. China

<sup>2</sup>Department of Medicine, the University of Chicago, Chicago, Illinois, 60637, USA

<sup>3</sup>South China Advanced Institute for Soft Matter Science and Technology, School of Molecular Science and Engineering, South China University of Technology, Guangzhou, 510640, P.R. China.

\*Correspondence should be addressed to Y. C. (E-mail: [yycheng@mail.ustc.edu.cn](mailto:yycheng@mail.ustc.edu.cn)); Q. Z. (E-mail: [qzhang@bio.ecnu.edu.cn](mailto:qzhang@bio.ecnu.edu.cn)).

**Keywords:** melanin-like nanoparticles, polydopamine, losartan, tumor penetration, photothermal therapy

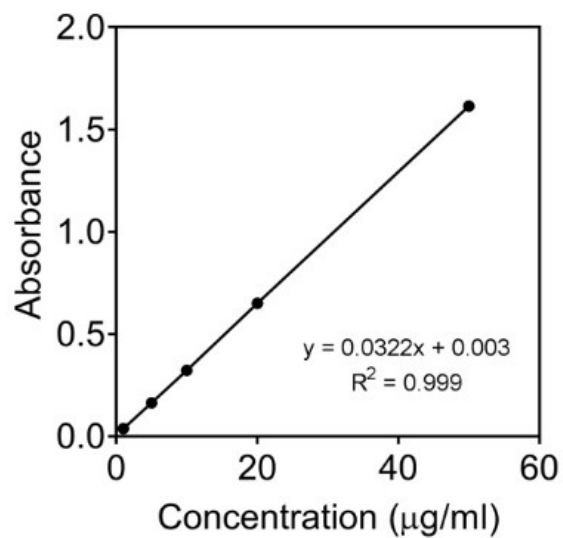

**Figure S1.** The calibration curve plots a linear relationship between the absorbance of LST at 250 nm and its concentration, which was measured by a UV-Vis spectrometer. The drug loading ratio of LST on PLST was 7.54%.

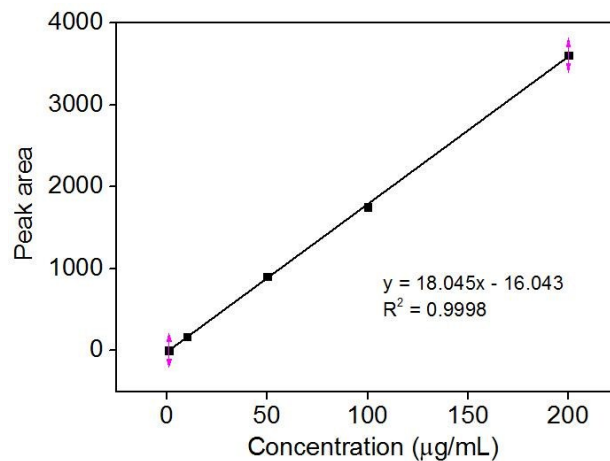

**Figure S2.** The plot of peak area of LST versus its concentration at 250 nm, which was measured by HPLC with chromatographic column of Pursuit C 18 (Figure S2). Acetonitrile and 0.1 % phosphoric acid (50:50) was used as mobile phase. The detection wavelength was set at 250 nm, and the flow rate was 1 mL/min with 25 °C column temperature. The drug loading ratio of LST on PLST was calculated to be 7.49 %.

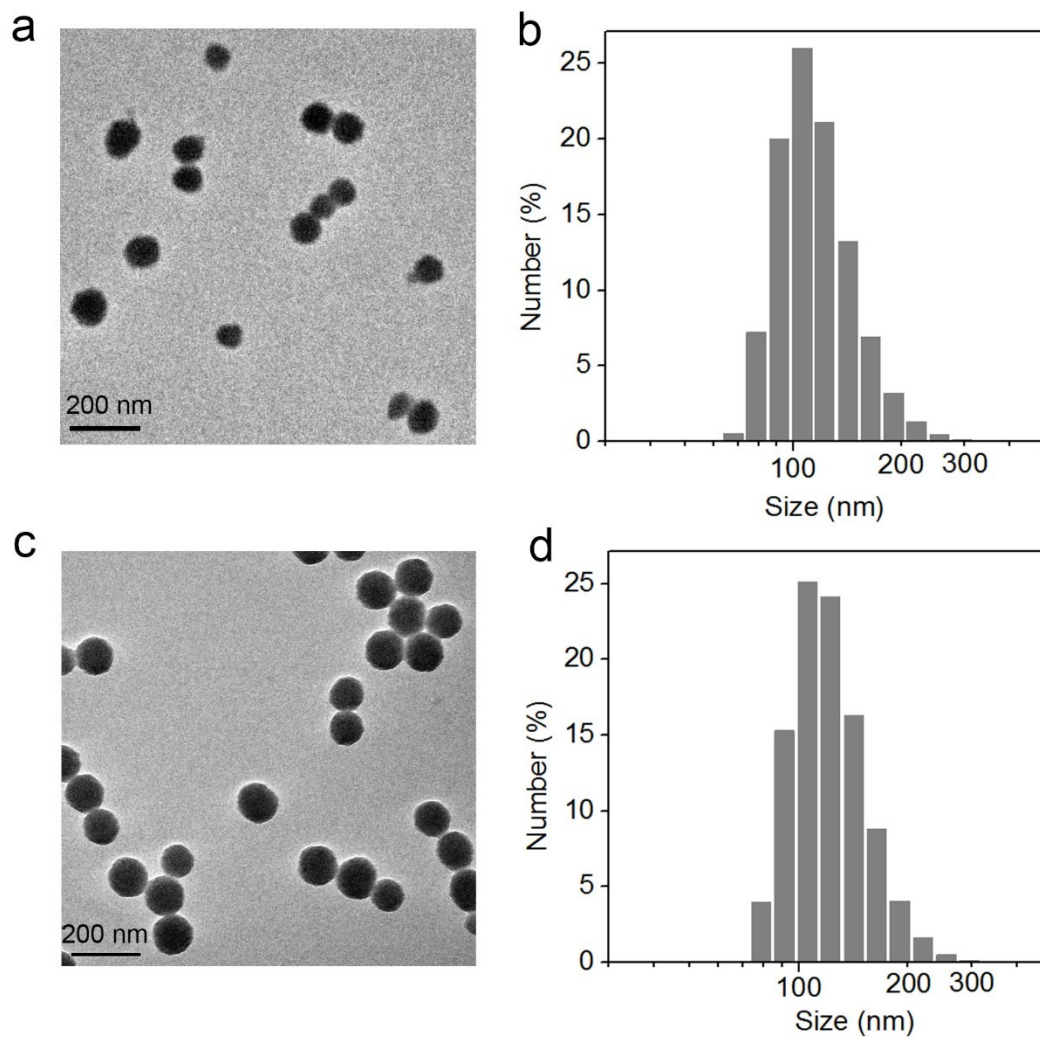

**Figure S3.** (a and b) TEM image of PDA and its size distribution (b). (c and d) TEM image of PDA@Fe and its size distribution.

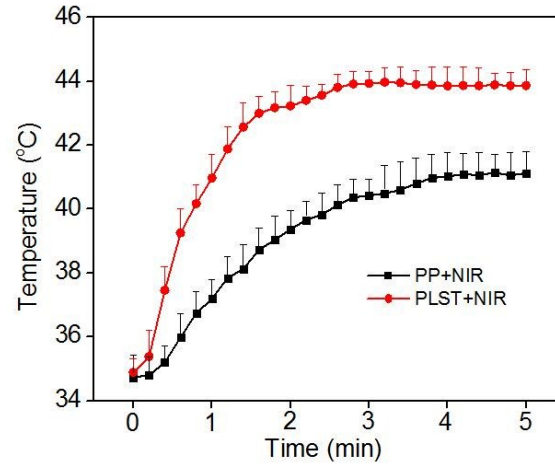

**Figure S4.** The tumor-site temperature changes while NIR irradiation 72 h after the first injection (n=3).

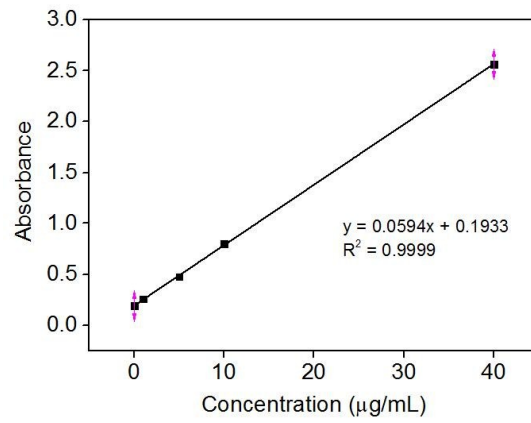

**Figure S5** The plot of the absorbance of mPEG-SH at 563 nm versus its concentration, which was determined by a UV-Vis spectrometer.
